# Supplementary material for: Gre factors help Salmonella adapt to oxidative stress by improving transcription elongation and fidelity of metabolic genes
Source: PubMed Central journal article supplement (PMC10072461; doi:10.1371/journal.pbio.3002051), 2023-04-04

Fig. 4B

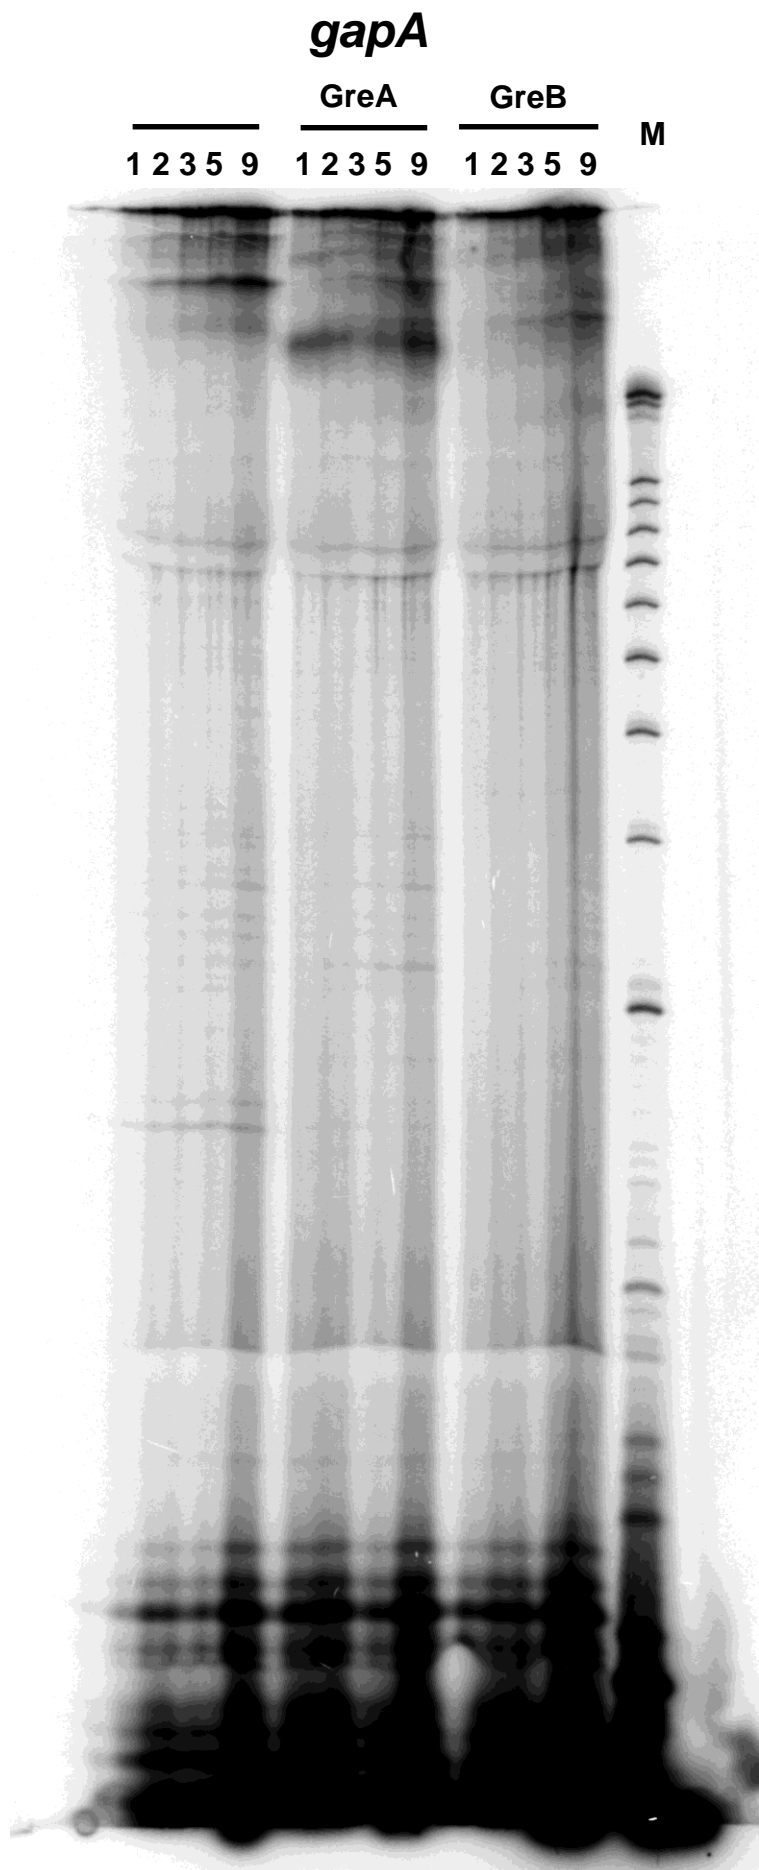

**Fig 4C**

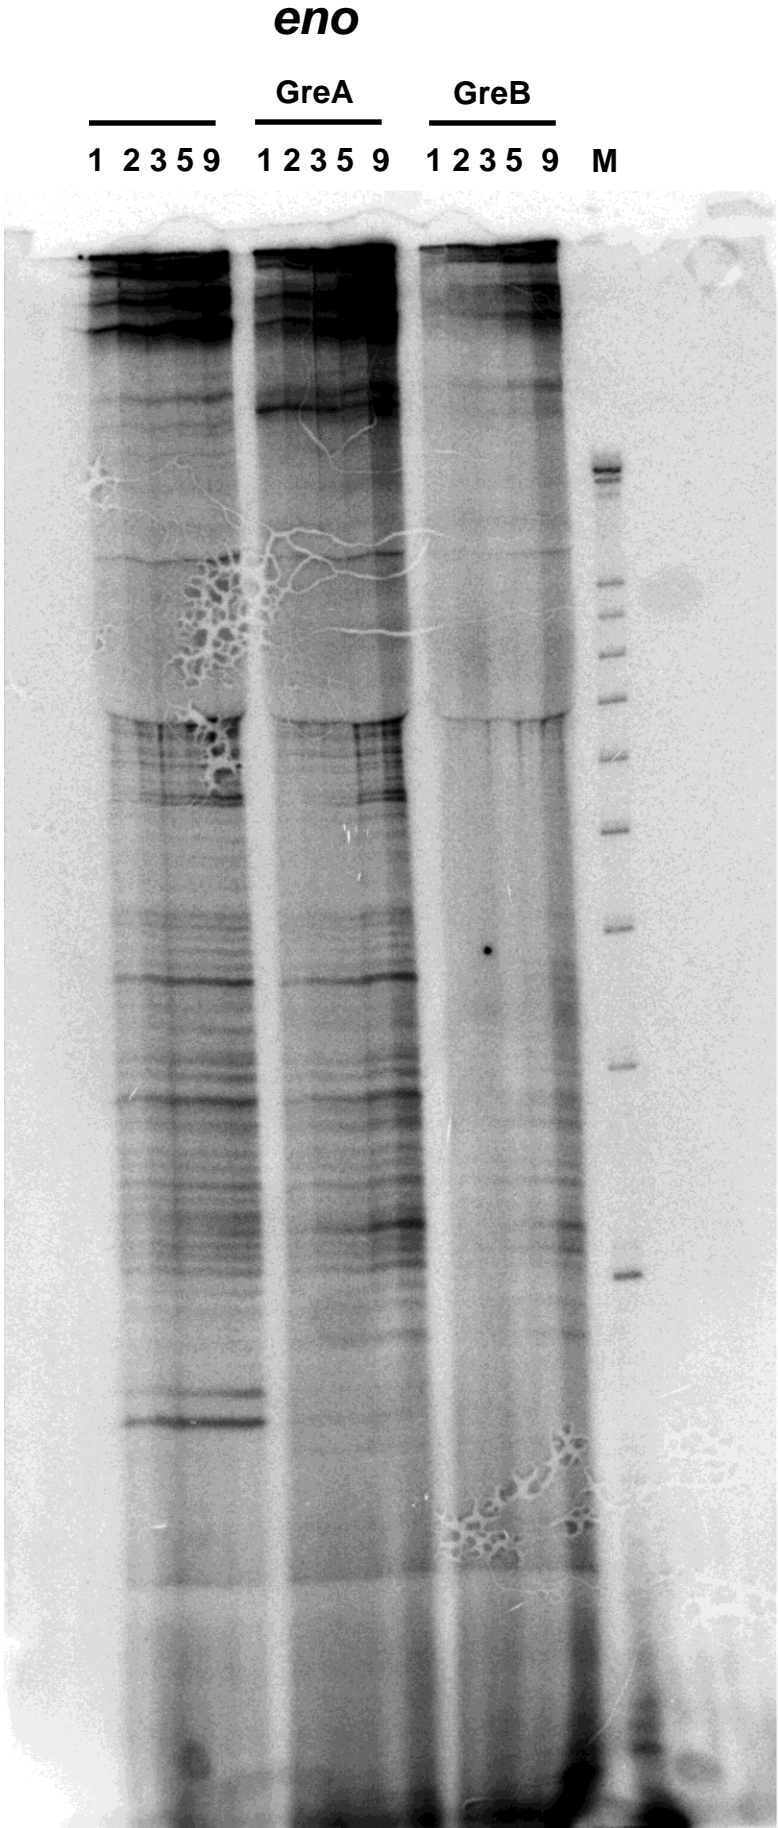

**Fig 4D**

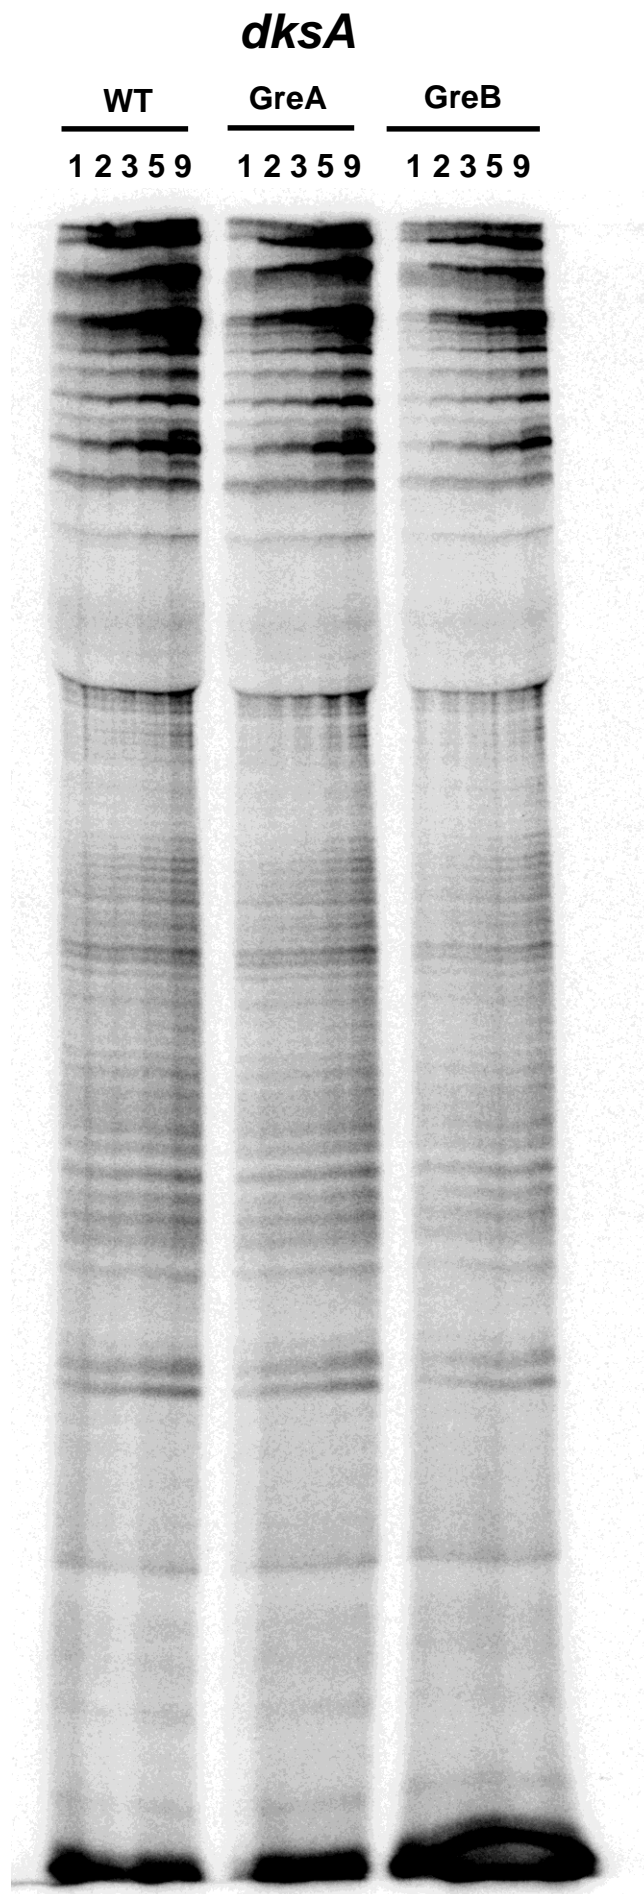

Fig 5B

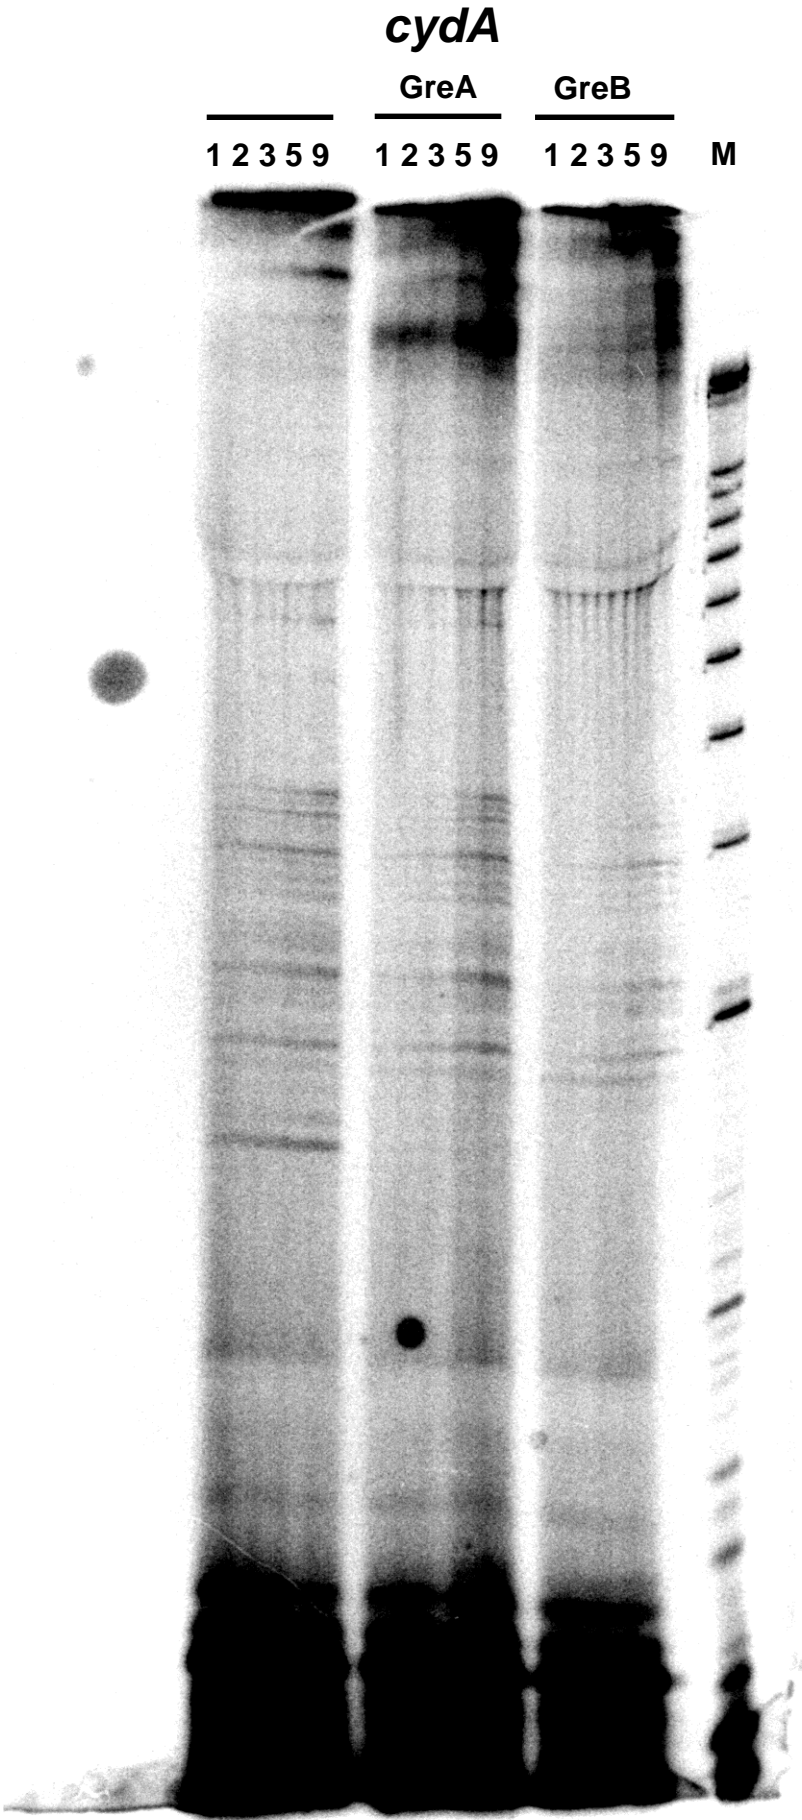

Fig. S3C

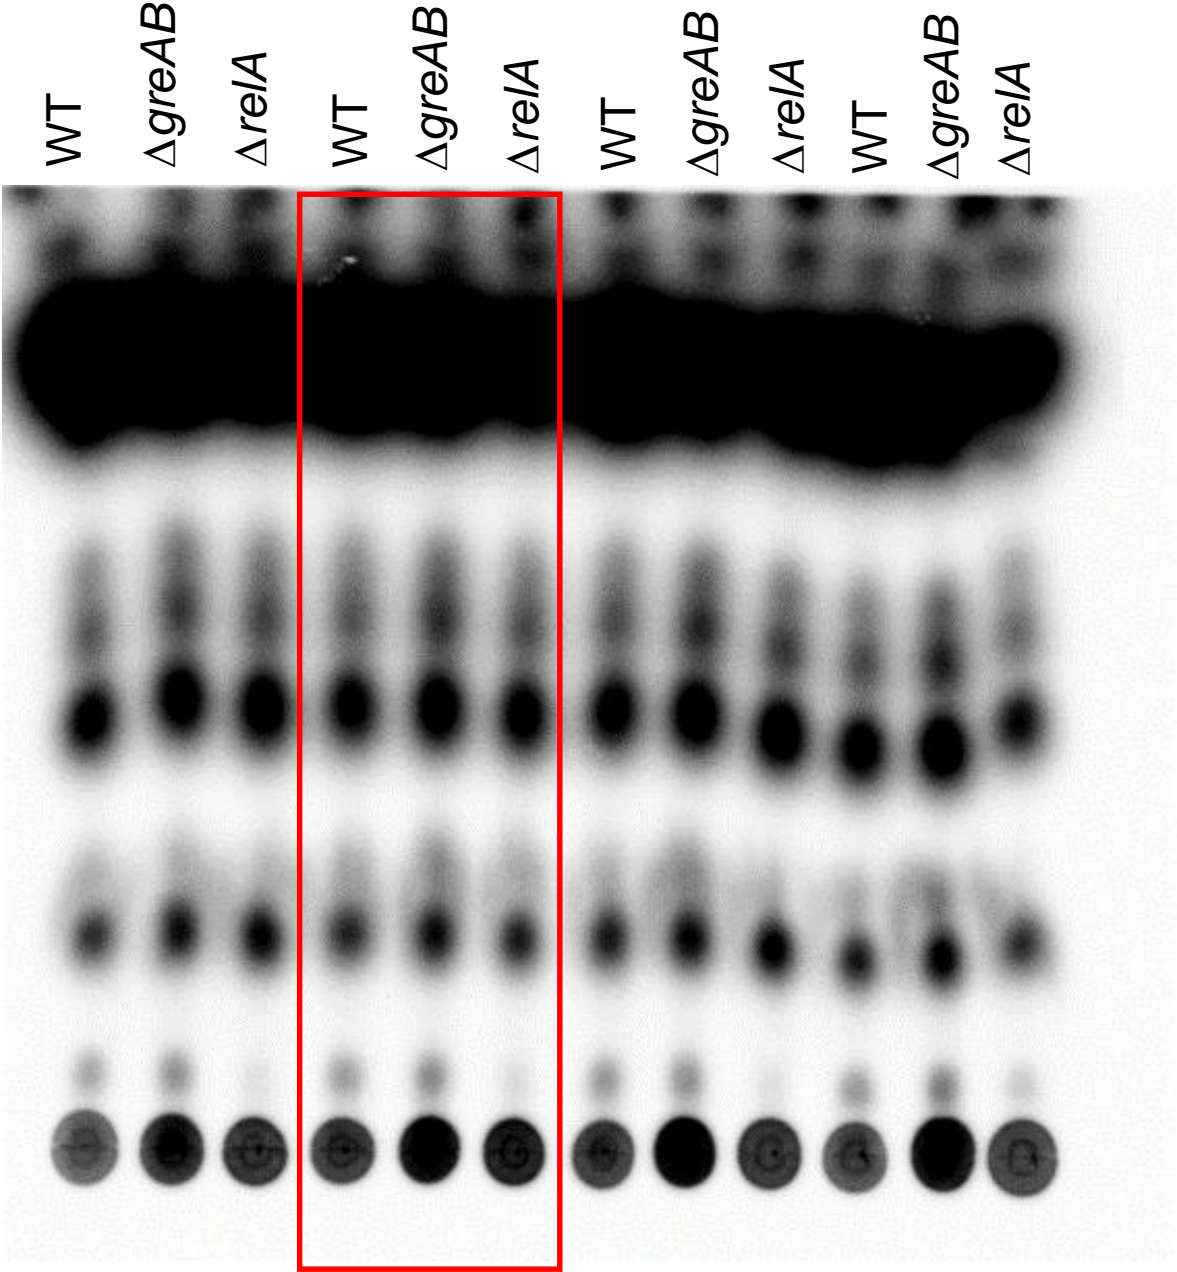

**Fig. S5A**

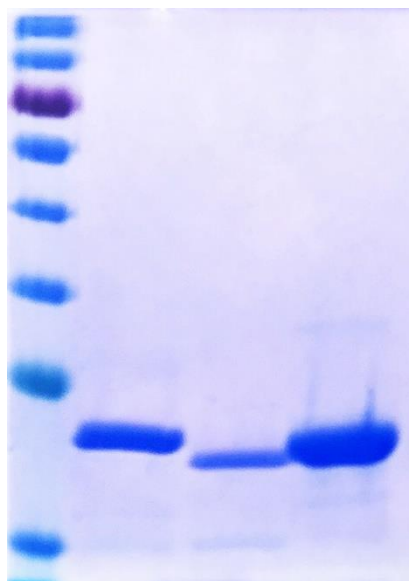

**Fig. S5B**

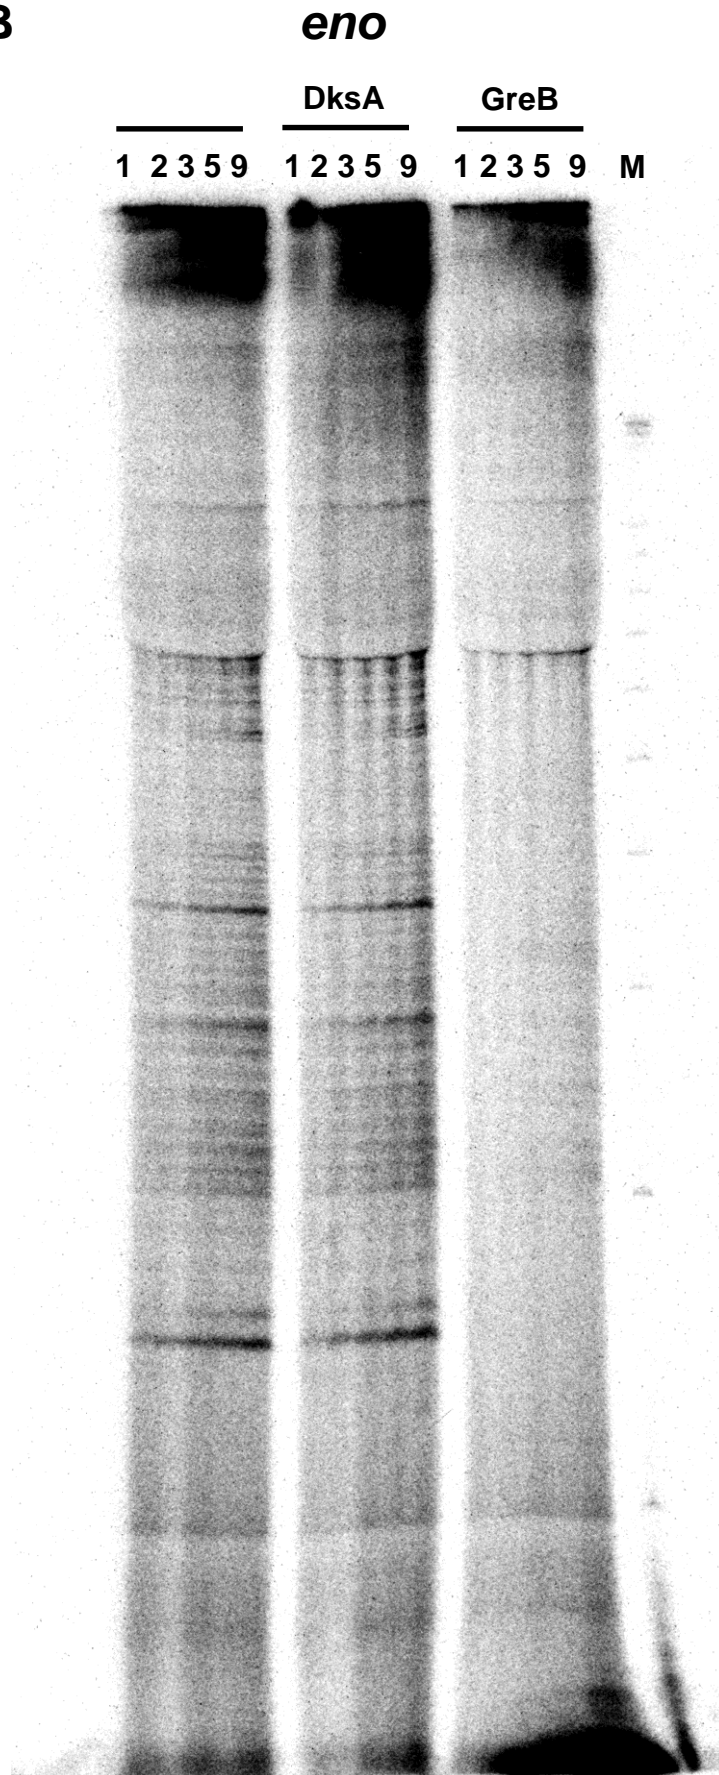

Supplement: pbio.3002051.s005.pdf [file pbio.3002051.s005.pdf]
